# Supplementary material
Source: Springer Nature journal article supplement (https://www.springermedizin.de/resource/supplementary/12889_2009_1799_MOESM2_ESM.pdf/9504040)

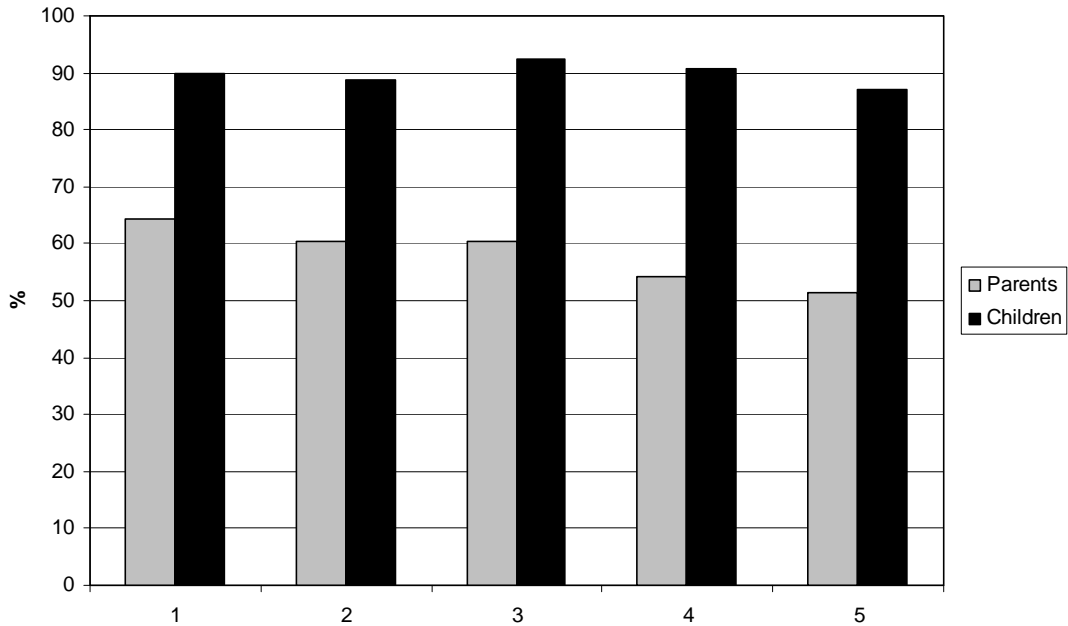

Supplement: MOESM2 [file 9504040]
